# Supplementary material for: Distance to Specialist Medical Care and Diagnosis of Obstructive Sleep Apnea in Rural Saskatchewan
Source: Hindawi journal article supplement (doi:10.1155/2019/1683124), 2019-01-14
Supplement: f1 [file 1683124.f1.pdf]

## Appendix A

**Supplemental Table 1. Characteristics of Adults Who Likely Required This Specialist Medical Care (n = 2813; 2230 households) by distance quartile.**

| Characteristics                                                      | Travel distance to specialist medical care < 100km<br>(n=548; 19%)<br>Column % | Travel distance to specialist medical care 100-189km<br>(n=783; 28%)<br>Column % | Travel distance to specialist medical care 190-249km<br>(n=721; 26%)<br>Column % | Travel distance to specialist medical care ≥ 250km<br>(n=761; 27%)<br>Column % | P value <sup>a</sup> |
|----------------------------------------------------------------------|--------------------------------------------------------------------------------|----------------------------------------------------------------------------------|----------------------------------------------------------------------------------|--------------------------------------------------------------------------------|----------------------|
| <b>Age, years</b>                                                    |                                                                                |                                                                                  |                                                                                  |                                                                                |                      |
| 18-45                                                                | 19.9                                                                           | 23.6                                                                             | 20.9                                                                             | 18.4                                                                           | .12                  |
| 46-55                                                                | 27.2                                                                           | 29.4                                                                             | 29.4                                                                             | 29.4                                                                           |                      |
| 56-65                                                                | 32.1                                                                           | 24.0                                                                             | 29.3                                                                             | 28.3                                                                           |                      |
| >65                                                                  | 20.8                                                                           | 23.0                                                                             | 20.4                                                                             | 23.9                                                                           |                      |
| <b>Sex</b>                                                           |                                                                                |                                                                                  |                                                                                  |                                                                                |                      |
| Females                                                              | 35.2                                                                           | 36.3                                                                             | 38.8                                                                             | 35.4                                                                           | .24                  |
| Males                                                                | 64.8                                                                           | 63.7                                                                             | 61.2                                                                             | 64.7                                                                           |                      |
| <b>Body mass index, kg/m<sup>2</sup></b>                             |                                                                                |                                                                                  |                                                                                  |                                                                                |                      |
| Normal (<25)                                                         | 18.8                                                                           | 18.4                                                                             | 20.7                                                                             | 16.8                                                                           | .52                  |
| Overweight (25-29.9)                                                 | 39.6                                                                           | 42.4                                                                             | 40.9                                                                             | 41.0                                                                           |                      |
| Obese (≥30)                                                          | 41.6                                                                           | 39.2                                                                             | 38.4                                                                             | 42.2                                                                           |                      |
| <b>Education level</b>                                               |                                                                                |                                                                                  |                                                                                  |                                                                                |                      |
| Postsecondary                                                        | 37.4                                                                           | 39.1                                                                             | 41.6                                                                             | 37.7                                                                           | .40                  |
| Secondary or less                                                    | 62.6                                                                           | 60.9                                                                             | 58.4                                                                             | 62.3                                                                           |                      |
| <b>Money left over at the end of the month</b>                       |                                                                                |                                                                                  |                                                                                  |                                                                                |                      |
| Some                                                                 | 58.9                                                                           | 60.0                                                                             | 61.6                                                                             | 55.6                                                                           | .19                  |
| Just enough                                                          | 18.4                                                                           | 21.6                                                                             | 18.6                                                                             | 20.1                                                                           |                      |
| Not enough                                                           | 22.6                                                                           | 18.4                                                                             | 19.8                                                                             | 24.3                                                                           |                      |
| <b>Heavy alcohol consumption, more than 5 drinks on one occasion</b> |                                                                                |                                                                                  |                                                                                  |                                                                                |                      |
| Never                                                                | 50.2                                                                           | 47.3                                                                             | 50.6                                                                             | 52.8                                                                           | .26                  |
| 1/month or less                                                      | 33.8                                                                           | 34.7                                                                             | 34.8                                                                             | 32.6                                                                           |                      |
| 1/week or less                                                       | 12.2                                                                           | 14.6                                                                             | 12.5                                                                             | 12.8                                                                           |                      |
| More than 1/week                                                     | 3.8                                                                            | 3.5                                                                              | 2.1                                                                              | 1.8                                                                            |                      |
| <b>Smoking status</b>                                                |                                                                                |                                                                                  |                                                                                  |                                                                                |                      |
| Never                                                                | 46.2                                                                           | 46.0                                                                             | 45.9                                                                             | 45.9                                                                           | .98                  |
| Past                                                                 | 41.1                                                                           | 39.6                                                                             | 40.8                                                                             | 41.3                                                                           |                      |
| Current                                                              | 12.8                                                                           | 14.4                                                                             | 13.3                                                                             | 12.9                                                                           |                      |

<sup>a</sup>P value from Rao-Scott chi-square tests for significant difference in proportions for travel distance to specialist medical care between levels of each variable.
